# Supplementary material for: Understanding the role of intersectoral convergence in the delivery of essential maternal and child nutrition interventions in Odisha, India: a qualitative study
Source: PubMed Central journal article supplement (PMC5290617; doi:10.1186/s12889-017-4088-z), 2017-02-02
Supplement: 12889_2017_4088_MOESM2_ESM.pdf [file 12889_2017_4088_MOESM2_ESM.pdf]

### DISTRICT-LEVEL INTERVIEW GUIDE

Types of Respondents:

**ICDS** - District Project Officer (DPO)

**Health** - District Program Manager (DPM), District Community Mobilizer (DCM)

**INTERVIEWER FILL OUT BEFORE LEAVING FOR INTERVIEW**

| Place                    |  | Respondent            |      |      |
|--------------------------|--|-----------------------|------|------|
| State (State code)       |  | Respondent's name     |      |      |
|                          |  | Respondent job title  |      |      |
| District (District code) |  | Respondent department |      |      |
|                          |  | Date of the interview | (dd) | (mm) |
| <b>FILE NAME :</b>       |  |                       |      |      |

**\*INFORMED CONSENT\*** - *Obtain permission from the interviewee to be interviewed.*

*Proceed after the interviewee gives consent to be interviewed:*

**INTERVIEWER FILL OUT AT BEGINNING OF INTERVIEW**

|    |                        |                                                                                             |
|----|------------------------|---------------------------------------------------------------------------------------------|
| 1. | Time interview started | <input type="text"/> <input type="text"/> Hrs <input type="text"/> <input type="text"/> Min |
|----|------------------------|---------------------------------------------------------------------------------------------|

**INTERVIEWER FILL OUT AT THE END OF INTERVIEW**

|                             |                                                                                                      |                                                                                             |
|-----------------------------|------------------------------------------------------------------------------------------------------|---------------------------------------------------------------------------------------------|
| 2.                          | Time interview ended                                                                                 | <input type="text"/> <input type="text"/> Hrs <input type="text"/> <input type="text"/> Min |
| 3.                          | Location of the interview                                                                            | 1. District office<br>2. -87 Other (Specify) _____                                          |
| 4.                          | Which language did the respondent speak? (circle the response)                                       | 1. Hindi<br>2. Odiya<br>-87 Other (specify) _____                                           |
| 5.                          | Who was present at the interview? (List all the people including the interviewer and the note taker) |                                                                                             |
| 6.                          | What is your assessment of the respondent's accuracy?                                                | 1. Good / okay<br>2. Not so good / bad (provide comments)                                   |
| <b>Interviewer Comments</b> |                                                                                                      |                                                                                             |
|                             |                                                                                                      |                                                                                             |

| Interview Status<br>(Circle the appropriate choice) |                                    |
|-----------------------------------------------------|------------------------------------|
| Completed                                           | Respondent unavailable             |
| Not found in the block                              | Respondent temporarily unavailable |
| Refused part way                                    | Refused full interview             |
| Recorded (Yes) (No)                                 |                                    |

| FOR SUPERVISOR ONLY               | Date<br>(dd/mm/yyyy)                                                                                     | Name of the supervisor |
|-----------------------------------|----------------------------------------------------------------------------------------------------------|------------------------|
| Supervisor reviewed the interview | <input type="text"/> <input type="text"/> <input type="text"/> <input type="text"/> <input type="text"/> | <input type="text"/>   |

***Instructions:*** Where multiple choices exist (ICDS/Health), **CIRCLE** the appropriate type of respondent you are directing the questions.

***[italics]*** = instructions to interviewer

***(italics)*** = examples or concepts for the interviewer to keep in mind.

#### A. GENERAL INFORMATION

1. How long have you been working as \_\_\_\_\_?

#### B. WORK RESPONSIBILITIES AND WORKLOAD

2. What are your main responsibilities as \_\_\_\_\_?

3. Who do you supervise? *[Interviewer: type of people that report to them]*

#### C. ICDS AND HEALTH SERVICES AND COORDINATION

4. What services and programs do you provide for mothers and children <2 years?

*[If not mentioned, probe for:]*

- 1-Breastfeeding counseling
- 2-Counseling on complementary feeding, including food safety, hygiene and sanitation
- 3-Maternal care and nutrition (for pregnant and lactating women)
- 4-IFA supplementation for 6-36 months and reproductive-age women
- 5-Immunization
- 6-Vitamin A supplementation
- 7-Deworming
- 8-Diarrhea treatment and prevention (ORS)
- 9-SAM treatment
- 10-Malaria treatment and prevention (bed nets)
- 11-Growth monitoring
- 12-Antenatal care
- 13-Supplementary nutrition for mothers and children
- 14-Any other programs specific to the district

5. Do you provide home visits?

*[Probe:]*

- Services covered

6. Which of the services require close coordination with (ICDS/Health) at the district-level?

7. Among these, where do you have **good** coordination with (ICDS/Health) at the district-level?

*[Probe:]*

- What makes you say that it is good? (*definition of good coordination*)
- Tell me about how you coordinate.
- What helps with coordination? (*facilitators to coordination*)
- What makes it difficult to coordinate? (*barriers to coordination*)

8. In which service have you had **poor** coordination with (ICDS/Health) at the district-level?

[Probe:]

- What makes you say that it is poor? (*definition of poor coordination*)
- Tell me about what happened.
- Was there coordination for this service before?
- What has made it difficult to coordinate now? (*barriers to coordination*)
- Did you try (doing) anything to make the situation better?
- Other instances where you faced poor coordination?

[If no or minimum coordination:]

- Do you think there should be more coordination?
- What is keeping you from having more coordination?
- What would be helpful in making this possible?

#### D. SPECIFIC MECHANISMS OF CONVERGENCE

9. Please tell us how do you coordinate action plans with (ICDS/Health) at the district-level?

[Probe:]

- 
- What do the action plans usually include?
- Anything that helps/makes it difficult to prepare the plans? (*facilitators and barriers*)
- Any state guidelines on how to prepare joint action plans?

10. Tell us how do you coordinate any trainings with (ICDS/Health) at the district-level?

[Probe:]

- What do the trainings usually cover? (*type/purpose of training*)
- Who receive these trainings?
- How often do you coordinate the trainings?
- Anything that helps/makes it difficult to coordinate? (*facilitators and barriers*)
- What would be helpful to make the coordination better?
- Any guidelines from the state on how to coordinate joint training?

[If no coordination:]

- Do you think there should be coordination for trainings?
- What would be helpful in making this possible?

11. Tell us how do you coordinate sector meetings with (ICDS/Health) at the district-level?

[Probe:]

|                                                                                                                                                                                                                                                                                                                                                                                                                                                                                                                                                                                                                                                                                                                                                                                                                                         |
|-----------------------------------------------------------------------------------------------------------------------------------------------------------------------------------------------------------------------------------------------------------------------------------------------------------------------------------------------------------------------------------------------------------------------------------------------------------------------------------------------------------------------------------------------------------------------------------------------------------------------------------------------------------------------------------------------------------------------------------------------------------------------------------------------------------------------------------------|
| <ul style="list-style-type: none"> <li>• What is usually covered during the meetings?</li> <li>• What happens after the meetings? [<i>e.g., follow-up, actions</i>]</li> <li>• How often do you coordinate the meetings?</li> <li>• Anything that helps/makes it difficult to coordinate? [<i>facilitators and barriers</i>]</li> <li>• What would be helpful to make the coordination better?</li> </ul> <p>[<i>If no coordination:</i>]</p> <ul style="list-style-type: none"> <li>• Do you think there should be joint meetings?</li> <li>• What would be helpful in making this possible?</li> </ul>                                                                                                                                                                                                                                |
| <p>12. Tell us how do you coordinate <u>supervision visits</u> with (ICDS/Health) at the district-level?</p> <p>[<i>Probe:</i>]</p> <ul style="list-style-type: none"> <li>• With whom do you usually conduct supervision visits?</li> <li>• For what purpose do you usually coordinate supervision visits?</li> <li>• How often do you coordinate the visits?</li> <li>• Anything that helps/makes it difficult to coordinate? [<i>facilitators and barriers</i>]</li> <li>• What would be helpful to make the coordination better?</li> <li>• Any guidelines from the state on how to coordinate supervision?</li> </ul> <p>[<i>If no coordination:</i>]</p> <ul style="list-style-type: none"> <li>• Do you think there should be coordination for supervision?</li> <li>• What would be helpful in making this possible?</li> </ul> |
| <p>13. Besides meetings, trainings and supervision, do you coordinate with (ICDS/Health) in anything else?</p>                                                                                                                                                                                                                                                                                                                                                                                                                                                                                                                                                                                                                                                                                                                          |
| <p>14. Please tell us how coordination among the district officials influences service delivery?</p>                                                                                                                                                                                                                                                                                                                                                                                                                                                                                                                                                                                                                                                                                                                                    |
| <p>15. What are your thoughts about how the overall coordination with (ICDS/Health) is working? (<i>e.g. helpful, not always practical or feasible, time consuming, not needed</i>)</p> <p>[<i>Probe:</i>]</p> <ul style="list-style-type: none"> <li>• Do you have any suggestions on ways to improve coordination?</li> </ul>                                                                                                                                                                                                                                                                                                                                                                                                                                                                                                         |
| <p>16. Please tell us about how guidelines are provided to block officials regarding coordination with (ICDS/Health)</p> <p>[<i>Probe:</i>]</p> <ul style="list-style-type: none"> <li>• Any guidelines for developing block micro plans?</li> <li>• Any guidelines for coordinating trainings?</li> <li>• Any guidelines for coordinating supervision?</li> <li>• Any guidelines for coordinating sector meetings?</li> <li>• Any guidelines for coordinating VHNDs?</li> </ul>                                                                                                                                                                                                                                                                                                                                                        |

**DEMOGRAPHIC INFORMATION**

Lastly, I would like to ask you some information about your background.

|                                                                                                                                              |                                                                                                                                                                                                                                                                                                                                                                                                                                                                  |
|----------------------------------------------------------------------------------------------------------------------------------------------|------------------------------------------------------------------------------------------------------------------------------------------------------------------------------------------------------------------------------------------------------------------------------------------------------------------------------------------------------------------------------------------------------------------------------------------------------------------|
| <p>17. Could you please tell me your age?</p>                                                                                                | <p>About _____ years<br/>88. Don't know/Do not want to tell</p>                                                                                                                                                                                                                                                                                                                                                                                                  |
| <p>18. What is the highest level of schooling you have completed and passed?<br/><br/><i>[Count only up to the level <u>passed</u>.]</i></p> | <p>1. Did not complete Class 1<br/>2. Class 1<br/>3. Class 2<br/>4. Class 3<br/>5. Class 4<br/>6. Class 5<br/>7. Class 6<br/>8. Class 7<br/>9. Class 8<br/>10. Class 9<br/>11. Class 10<br/>12. Class 11<br/>13. Class 12<br/>14. Graduate and above<br/>15. Other diploma<br/>16. Madrassa (if no formal classes exist)<br/>17. Tuitions / teaching at home<br/>18. Other training / courses / camps only<br/>19. No schooling<br/>87. Other (specify)_____</p> |

**Thank you!**
