# Supplementary material for: Understanding the role of intersectoral convergence in the delivery of essential maternal and child nutrition interventions in Odisha, India: a qualitative study
Source: Springer Nature journal article supplement (doi:10.1186/s12889-017-4088-z), 2017-02-02
Supplement: MOESM3 [file 12038218]

### BLOCK-LEVEL INTERVIEW GUIDE

Types of Respondents:

**ICDS** - Child Development Project Officer (CDPO), Lady Supervisors (LS)

**Health** - Block Program Manager (BPM), Public Health Extension Officer (PHEO)/Block Community Mobilizer (BCM)

**INTERVIEWER FILL OUT BEFORE LEAVING FOR INTERVIEW**

| Place                    |  | Respondent            |      |      |
|--------------------------|--|-----------------------|------|------|
| State (State code)       |  | Respondent's name     |      |      |
|                          |  | Respondent job title  |      |      |
| District (District code) |  | Respondent department |      |      |
|                          |  | Date of the interview | (dd) | (mm) |
| Block (Block code)       |  |                       |      |      |
| <b>FILE NAME :</b>       |  |                       |      |      |

**\*INFORMED CONSENT\*** - Obtain permission from the interviewee to be interviewed.

*Proceed after the interviewee gives consent to be interviewed:*

**INTERVIEWER FILL OUT AT BEGINNING OF INTERVIEW**

|    |                        |                                                                                             |
|----|------------------------|---------------------------------------------------------------------------------------------|
| 1. | Time interview started | <input type="text"/> <input type="text"/> Hrs <input type="text"/> <input type="text"/> Min |
|----|------------------------|---------------------------------------------------------------------------------------------|

**INTERVIEWER FILL OUT AT THE END OF INTERVIEW**

|                             |                                                                                                      |                                                                                             |
|-----------------------------|------------------------------------------------------------------------------------------------------|---------------------------------------------------------------------------------------------|
| 2.                          | Time interview ended                                                                                 | <input type="text"/> <input type="text"/> Hrs <input type="text"/> <input type="text"/> Min |
| 3.                          | Location of the interview                                                                            | 1. Block office<br>2. HSC<br>3. -87 Other (Specify) _____                                   |
| 4.                          | Which language did the respondent speak? (circle the response)                                       | 1. Hindi<br>2. Odiya<br>-87 Other (specify) _____                                           |
| 5.                          | Who was present at the interview? (List all the people including the interviewer and the note taker) |                                                                                             |
| 6.                          | What is your assessment of the respondent's accuracy?                                                | 1. Good / okay<br>2. Not so good / bad (provide comments)                                   |
| <b>Interviewer Comments</b> |                                                                                                      |                                                                                             |
|                             |                                                                                                      |                                                                                             |

| Interview Status (Circle) |                                    |
|---------------------------|------------------------------------|
| Completed                 | Respondent unavailable             |
| Not found in the block    | Respondent temporarily unavailable |
| Refused part way          | Refused full interview             |
| Recorded (Yes) (No)       |                                    |

| FOR SUPERVISOR ONLY               | Date (dd/mm/yyyy)    |                      |                      |                      | Name of the supervisor |
|-----------------------------------|----------------------|----------------------|----------------------|----------------------|------------------------|
| Supervisor reviewed the interview | <input type="text"/> | <input type="text"/> | <input type="text"/> | <input type="text"/> |                        |

***Instructions:*** Where multiple choices exist (ICDS/Health), **CIRCLE** the appropriate type of respondent you are directing the questions.

***[italics]*** = instructions to interviewer

***(italics)*** = examples or concepts for the interviewer to keep in mind

#### **A. GENERAL INFORMATION**

1. How long have you been working as \_\_\_\_\_?

2. What was your previous job/position?

#### **B. WORK RESPONSIBILITIES AND WORKLOAD**

3. What are your main responsibilities as \_\_\_\_\_?

4. Who do you supervise?

*[Probe:]*

- How many?

#### **C. ICDS AND HEALTH SERVICES AND COORDINATION**

5. What services for mothers and children <2 years do you provide?

*[If not mentioned, probe for:]*

- 1-Breastfeeding counseling
- 2-Counseling on complementary feeding, including food safety, hygiene and sanitation
- 3-Maternal care and nutrition (for pregnant and lactating women)
- 4-IFA supplementation for 6-36 months and reproductive-age women
- 5-Immunization
- 6-Vitamin A supplementation
- 7-Deworming
- 8-Diarrhea treatment and prevention (ORS)
- 9-SAM treatment
- 10-Malaria treatment and prevention (bed nets)
- 11-Growth monitoring
- 12-Antenatal care
- 13-Supplementary nutrition for mothers and children

6. How is \_\_\_\_\_ (service) \_\_\_\_\_ provided?

*[Probe:]*

- Who provides?
- Ways (ICDS/Health) is involved
- How coordinate with (ICDS/Health)

*If not mentioned, then probe:*

- Where are services such as counseling on infant and young child feeding, immunization, and pregnancy care provided?
- Who provides them?
- How do the different workers coordinate home visits?

7. Which of these services require close coordination with (ICDS/Health) among block-level officials?

8. Among these, where do you have **good** coordination with (ICDS/Health) at the block-level?

*[Probe:]*

- What makes you say that it is good? (*definition of good coordination*)
- Tell me about how you coordinate, from planning to service delivery.
- What helps you to coordinate? (*facilitators to coordination*)
- What makes it difficult to coordinate? (*barriers to coordination*)

9. In which service have you had **poor** coordination with (ICDS/Health) at the block-level?

*[Probe:]*

- What makes you say that it is poor? (*definition of poor coordination*)
- Tell me about what happened.
- Was there coordination for this service before?
- What has made it difficult to coordinate now? (*barriers to coordination*)
- Did you try (doing) anything to make the situation better?
- Are there other instances where you faced poor coordination?

*If there is no poor coordination, then:*

- In which service do you think there needs to be more or better coordination?
- How could this coordination be improved?

#### **D. SPECIFIC MECHANISMS OF CONVERGENCE**

10. Please tell me about how you coordinate any trainings with block officials in (ICDS/Health)?

*[Probe:]*

- What do the trainings usually cover? (*type/purpose of training*)
- How often do you coordinate the trainings?
- Anything that helps/makes it difficult to coordinate? (*facilitators and barriers*)
- What would be helpful to make the coordination better?
- Any guidelines on how to coordinate trainings?

*[If no coordination:]*

- Do you think there should be coordination for trainings?
- What would be helpful in making this possible?

|                                                                                                                                                                                                                                                                                                                                                                                                                                                                                                                                                                                                                                                                                                                                                                                                                |
|----------------------------------------------------------------------------------------------------------------------------------------------------------------------------------------------------------------------------------------------------------------------------------------------------------------------------------------------------------------------------------------------------------------------------------------------------------------------------------------------------------------------------------------------------------------------------------------------------------------------------------------------------------------------------------------------------------------------------------------------------------------------------------------------------------------|
| <p>11. Tell me how you coordinate <u>supervision visits</u> with block officials in (ICDS/Health)?</p> <p><i>[Probe:]</i></p> <ul style="list-style-type: none"> <li>• With whom do you usually conduct supervision visits?</li> <li>• For what purpose do you most often coordinate supervision?</li> <li>• How often do you coordinate the visits?</li> <li>• Anything that helps/makes it difficult to coordinate? (<i>facilitators and barriers</i>)</li> <li>• What would be helpful to make the coordination better?</li> <li>• Any guidelines on how to coordinate supervision?</li> </ul> <p><i>[If no coordination:]</i></p> <ul style="list-style-type: none"> <li>• Do you think there should be coordination for supervision?</li> <li>• What would be helpful in making this possible?</li> </ul> |
| <p>12. Tell me how you coordinate <u>sector meetings</u> with block officials in (ICDS/Health)?</p> <p><i>[Probe:]</i></p> <ul style="list-style-type: none"> <li>• What is usually covered during the meetings?</li> <li>• How often do you coordinate the meetings?</li> <li>• Anything that helps/makes it difficult to coordinate? (<i>facilitators and barriers</i>)</li> <li>• What would be helpful to make the coordination better?</li> <li>• Any guidelines on how to coordinate sector meetings?</li> </ul> <p><i>[If no coordination:]</i></p> <ul style="list-style-type: none"> <li>• Do you think there should be coordination for sector meetings?</li> <li>• What would be helpful in making this possible?</li> </ul>                                                                        |
| <p>13. Besides meetings, trainings and supervision, do you coordinate with block officials of (ICDS/Health) in anything else? [<i>e.g., developing action plans</i>]</p>                                                                                                                                                                                                                                                                                                                                                                                                                                                                                                                                                                                                                                       |
| <p>14. [<i>*Insert Question about any <u>district-specific mechanisms</u> of coordination, if any identified during district interviews.</i>]</p>                                                                                                                                                                                                                                                                                                                                                                                                                                                                                                                                                                                                                                                              |
| <p>15. What is the role of Village Health Sanitation Committees (VHSCs) in promoting services?</p>                                                                                                                                                                                                                                                                                                                                                                                                                                                                                                                                                                                                                                                                                                             |
| <p>16. What role do VHNSCs play in promoting coordination between ICDS and Health?</p>                                                                                                                                                                                                                                                                                                                                                                                                                                                                                                                                                                                                                                                                                                                         |
| <p>17. Please tell me how is PRI involved in promoting maternal and child nutrition?</p> <p><i>[Probe:]</i></p> <ul style="list-style-type: none"> <li>• Role of PRI members in promoting coordination between ICDS and Health?</li> </ul>                                                                                                                                                                                                                                                                                                                                                                                                                                                                                                                                                                     |

18. How do you think coordination with (ICDS/Health) at the block-level is influencing service delivery? (*e.g. more efficient, increase coverage, or no changes*)

19. What are your thoughts about how the overall coordination with (ICDS/Health) is working? (*e.g. helpful, not always practical or feasible, time consuming, not needed*)

[Probe:]

- Do you have any suggestions on ways to improve coordination?

### E. ROUTINIZATION OF VILLAGE HEALTH AND NUTRITION DAYS (VHND)

20. Tell me how VHNDs started in your area?

[Probe:]

- When did it start?
- Reason for starting VHND. Was there someone or some policy/guidelines that initiated it?

21. Please tell me about how VHNDs are organized in your block.

[Probe:]

- How often are VHNDs conducted?
- Where are they usually conducted?
- Any special order/way in how activities are conducted?
- Any rituals established with VHNDs? (*e.g. ceremonies, celebrations, periodic gatherings*)
- Reasons for conducting these rituals?
- Any guidelines or manual used?

22. Tell me about the staff involved in planning and conducting VHNDs in your block. (*i.e., block officials and FLWs*)

[Probe:]

- How do they know how to conduct VHNDs? (*e.g. training or orientation on conducting VHNDs*)
- How often is there a shortage of staff for conducting VHNDs? How do you handle it?

23. How did you learn about how to organize and conduct VHNDs?

[Probe:]

- Training/orientation received? (*what was learned*)
- Who provided the training/orientation?
- Other participants?

24. What services are usually provided during the VHNDs?

*[If not mentioned, probe for:]*

- 1-Breastfeeding counseling
- 2-Counseling or community discussions on complementary feeding, including food safety, hygiene and sanitation
- 3-Counseling on maternal care and nutrition (for pregnant and lactating women)
- 4-IFA supplementation for 6-36 months and reproductive-age women
- 5-Immunization
- 6-Vitamin A supplementation
- 7-Deworming
- 8-Diarrhea treatment and prevention (ORS)
- 9-SAM referrals
- 10-Malaria treatment and prevention (bed nets)
- 11-Growth monitoring
- 12-Registration of pregnant women
- 13-Antenatal care
- 14-Supplementary nutrition provided for underweight children

*[Probe:]*

- How often are these services provided during VHNDs? (*frequency of service*)
- How much time is spent on providing these activities during VHNDs? How do you handle it?

25. How is money/funds used to conduct VHNDs?

*[Probe:]*

- Different uses of money in conducting VHNDs? (*e.g. incentives for AWW or ASHA, preparation of complementary food, THR, etc.*)
- Where does the money come from? (*source of money*)
- Is the money usually enough to cover the needs? How do you handle it?
- For how long do you think that these funds will be available?

26. Tell me about the materials or equipment used for VHNDs.

*[Probe:]*

- Types of materials or equipment are required to conduct VHNDs? (*e.g. weighing scales, table, screen, medical supplies, THR, referral slips, IEC materials for counseling, MCPC cards, vaccinations, IFA tablets, deworming tablets, etc.*)
- Where do they come from? (*source of materials and equipment*)
- Are there usually enough? How do you handle it?
- For how long do you think that the materials or equipment will be available?

27. Who usually participates in VHND?

*[Probe:]*

- Who attends VHNDs? (*e.g. pregnant or lactating women, children, adolescents, newly married couples, etc.*)
- Which of the ICDS or Health officials attend VHNDs? How often do they attend?

|                                                                                                                                                                                                                                                                                                                                                                                                                                                                                                                                                                                                                                                                                                                                                                                                                                                                                                                                              |
|----------------------------------------------------------------------------------------------------------------------------------------------------------------------------------------------------------------------------------------------------------------------------------------------------------------------------------------------------------------------------------------------------------------------------------------------------------------------------------------------------------------------------------------------------------------------------------------------------------------------------------------------------------------------------------------------------------------------------------------------------------------------------------------------------------------------------------------------------------------------------------------------------------------------------------------------|
| <p>28. How do people recognize VHND or talk about it?</p> <p><i>[Probe:]</i></p> <ul style="list-style-type: none"> <li>• Any visible logos, images or pictures that are commonly used to represent VHND?</li> <li>• Any specific names or words for VHNDs? <i>[especially if VHND called by a different name]</i> Any words or phrases commonly used during VHNDs?</li> </ul>                                                                                                                                                                                                                                                                                                                                                                                                                                                                                                                                                               |
| <p>29. How are VHNDs usually supervised?</p> <p><i>[Probe:]</i></p> <ul style="list-style-type: none"> <li>• Who from ICDS and Health/NRHM supervises VHNDs?</li> <li>• What is usually done/checked when VHNDs are visited?</li> <li>• Any documents or checklists used to supervise VHNDs?</li> <li>• What are the criteria used to decide if a VHND is successful?</li> </ul>                                                                                                                                                                                                                                                                                                                                                                                                                                                                                                                                                             |
| <p>30. Tell me about any changes that have been made to the VHNDs since it first started.</p> <p><i>[Probe:]</i></p> <ul style="list-style-type: none"> <li>• Types of changes were made for the staff working on VHNDs? <i>(e.g. VHND task assignment to different staff involved, changes to supervision)</i></li> <li>• Types of changes were made to the facility, materials or equipment for VHNDs? <i>(e.g. painting of AWCs, new IEC materials, new equipment, etc.)</i></li> <li>• Any changes made to the types of activities conducted at VHNDs?</li> <li>• Any changes made to how activities are organized or conducted?</li> <li>• Reasons for making these changes? <i>[Probe for each of the changes.]</i></li> </ul> <p><i>[If no changes made:]</i></p> <ul style="list-style-type: none"> <li>• What are some changes you would like to make to VHNDs?</li> <li>• What keeps/stops you from making any changes?</li> </ul> |
| <p>31. In which ways do you think VHND is helping or not helping in delivering the services??</p> <p><i>[Probe:]</i></p> <ul style="list-style-type: none"> <li>• Ways service delivery improved because of VHND? <i>(e.g. quality, organization, coverage)</i></li> <li>• Ways service delivery worsened because of VHND?</li> <li>• Any influence VHNDs have on the work of your staff? <i>(e.g., make the work more difficult, help improved the work, etc.)</i></li> <li>• Any quality of services changes?</li> </ul> <p><i>[If no changes:]</i></p> <ul style="list-style-type: none"> <li>• Reasons for no changes?</li> <li>• What needs to be done to make improvements?</li> </ul>                                                                                                                                                                                                                                                 |
| <p>32. How do you think VHND is influencing utilization of services?</p>                                                                                                                                                                                                                                                                                                                                                                                                                                                                                                                                                                                                                                                                                                                                                                                                                                                                     |

*[Probe:]*

- Ways service utilization activities improved because of VHND? (*e.g. coverage, access, timeliness*)
- What helped to make such improvements?
- Ways service utilization worsened because of VHND?
- What difficulties led to such deterioration?

*[If no changes:]*

- Reasons for no changes?
- What needs to be done to make improvements?

#### **F. WORK SUPERVISION**

33. Who is your immediate supervisor?

34. Tell me about the meetings with your supervisor.

*[Probe:]*

- Purpose of the meetings? (*topics covered*)
- In the last 6 months, how many times did your supervisor visit you?
- Purpose of your supervisor's last visit?
- When do you expect to meet your supervisor again?

#### **G. WORK TRAINING**

35. What kinds of training have you received in the past 2 years?

#### **H. JOB SATISFACTION AND WORK SUPPORT**

36. How do you feel about working as \_\_\_\_\_?

*[Probe:]*

- What makes you feel this way?
- When do you feel this way? (*e.g. specific situations or events*)

37. Tell me about the support you receive from your superiors (*i.e. district-level*)?

*[Probe:]*

- Which of your superiors provide support to you?
- Types of support do you receive?
- Other types of services that would help you?

*[If no support:]*

- Types of support you would like to receive?



38. What are your thoughts about the adequacy of staffing in support of your work?

*[Probe:]*

- How often do (LS/AWW/ANM/ASHA) change in your block? (*personnel turnover*)

39. Tell me about the support you receive from the civil society/community or other groups?

*[Probe:]*

- Which civil society groups or organizations actively support you?
- Types of support usually provided?

*[If no support:]*

- Reasons for not receiving support?
- What types of support would you like to receive?

**DEMOGRAPHIC INFORMATION**

Lastly, I would like to ask you some information about your background.

|                                                                                                                                              |                                                                                                                                                                                                                                                                                                                                                                                                                                                                  |
|----------------------------------------------------------------------------------------------------------------------------------------------|------------------------------------------------------------------------------------------------------------------------------------------------------------------------------------------------------------------------------------------------------------------------------------------------------------------------------------------------------------------------------------------------------------------------------------------------------------------|
| <p>40. Could you please tell me your age?</p>                                                                                                | <p>About _____ years<br/>88. Don't know/Do not want to tell</p>                                                                                                                                                                                                                                                                                                                                                                                                  |
| <p>41. What is the highest level of schooling you have completed and passed?<br/><br/><i>[Count only up to the level <u>passed</u>.]</i></p> | <p>1. Did not complete Class 1<br/>2. Class 1<br/>3. Class 2<br/>4. Class 3<br/>5. Class 4<br/>6. Class 5<br/>7. Class 6<br/>8. Class 7<br/>9. Class 8<br/>10. Class 9<br/>11. Class 10<br/>12. Class 11<br/>13. Class 12<br/>14. Graduate and above<br/>15. Other diploma<br/>16. Madrassa (if no formal classes exist)<br/>17. Tuitions / teaching at home<br/>18. Other training / courses / camps only<br/>19. No schooling<br/>87. Other (specify)_____</p> |

**Thank you!**
