# Supplementary material for: Understanding the role of intersectoral convergence in the delivery of essential maternal and child nutrition interventions in Odisha, India: a qualitative study
Source: Springer Nature journal article supplement (doi:10.1186/s12889-017-4088-z), 2017-02-02
Supplement: MOESM4 [file 12038218]

## FRONTLINE WORKER INTERVIEW GUIDE

### Types of Respondents:

**ICDS** - Anganwadi Worker (AWW)

**Health** - Auxillary Nurse Midwife (ANM)/Health Worker Female (HWF) [or Health Worker Male (HWM)], and Accredited Social Health Activist (ASHA)

### INTERVIEWER FILL OUT BEFORE LEAVING FOR INTERVIEW

| Place                    |  | Respondent            |                      |      |        |
|--------------------------|--|-----------------------|----------------------|------|--------|
| State (State code)       |  | Respondent name       | Respondent job title |      |        |
| District (District code) |  | Respondent department |                      |      |        |
| Block (Block code)       |  | Date of the interview | (dd)                 | (mm) | (yyyy) |
| Village (Village code)   |  |                       |                      |      |        |
| <b>FILE NAME :</b>       |  |                       |                      |      |        |

**\*INFORMED CONSENT\*** - *Obtain permission from the interviewee to be interviewed.*

*Proceed after the interviewee gives consent to be interviewed:*

### INTERVIEWER FILL OUT AT BEGINNING OF INTERVIEW

|    |                        |                                                                                             |
|----|------------------------|---------------------------------------------------------------------------------------------|
| 1. | Time interview started | <input type="text"/> <input type="text"/> Hrs <input type="text"/> <input type="text"/> Min |
|----|------------------------|---------------------------------------------------------------------------------------------|

### INTERVIEWER FILL OUT AT THE END OF INTERVIEW

|                             |                                                                                                               |                                                                                             |
|-----------------------------|---------------------------------------------------------------------------------------------------------------|---------------------------------------------------------------------------------------------|
| 2.                          | Time interview ended                                                                                          | <input type="text"/> <input type="text"/> Hrs <input type="text"/> <input type="text"/> Min |
| 3.                          | Location of the interview                                                                                     | 1. Block office<br>2. HSC<br>3. -87 Other (Specify) _____                                   |
| 4.                          | Which language did the respondent speak? (circle the response)                                                | 1. Hindi<br>2. Odiya<br>-87 Other (specify) _____                                           |
| 5.                          | Who was present at the interview? ( <i>List all the people including the interviewer and the note taker</i> ) |                                                                                             |
| 6.                          | What is your assessment of the respondent's accuracy?                                                         | 1. Good / okay<br>2. Not so good / bad (provide comments)                                   |
| <b>Interviewer Comments</b> |                                                                                                               |                                                                                             |
|                             |                                                                                                               |                                                                                             |
|                             |                                                                                                               |                                                                                             |

| Interview Status<br>(Circle the appropriate choice) |                                    |
|-----------------------------------------------------|------------------------------------|
| Completed                                           | Respondent unavailable             |
| Not found in the village                            | Respondent temporarily unavailable |
| Refused part way                                    | Refused full interview             |
| Recorded (Yes) (No)                                 |                                    |

| FOR SUPERVISOR ONLY               | Date<br>(dd/mm/yyyy) |                      |                      |                      | Name of the supervisor |
|-----------------------------------|----------------------|----------------------|----------------------|----------------------|------------------------|
| Supervisor reviewed the interview | <input type="text"/> | <input type="text"/> | <input type="text"/> | <input type="text"/> | <input type="text"/>   |

**Instructions:** Where multiple choices exist (AWW/ANM/ASHA), **CIRCLE** the appropriate type of respondent you are directing the questions.

*[italics]* = instructions to interviewer

*(italics)* = examples or concepts for the interviewer to keep in mind

#### A. GENERAL INFORMATION

|                                             |
|---------------------------------------------|
| 1. How long have you been working as _____? |
| 2. What was your previous job/position?     |

#### B. WORKLOAD

|                                                                                                                                                                                                       |
|-------------------------------------------------------------------------------------------------------------------------------------------------------------------------------------------------------|
| 3. How much time do you spend every day working as (AWW/ANM/ASHA)?                                                                                                                                    |
| 4. In the past 1 year, what tasks other than your regular work did you do because your supervisors told you to?<br><br><i>[Probe:]</i> <ul style="list-style-type: none"> <li>• How often?</li> </ul> |

#### C. ICDS AND HEALTH SERVICES AND COORDINATION

|                                                                                                                                                                                                                                                                                                                                                                                                                                                                                                                                                                                                                                                                                                                                                                                                                                                                     |
|---------------------------------------------------------------------------------------------------------------------------------------------------------------------------------------------------------------------------------------------------------------------------------------------------------------------------------------------------------------------------------------------------------------------------------------------------------------------------------------------------------------------------------------------------------------------------------------------------------------------------------------------------------------------------------------------------------------------------------------------------------------------------------------------------------------------------------------------------------------------|
| 5. What services do <u>you</u> provide for mothers and children <2 years?<br><br><i>[If not mentioned, probe for:]</i> <ul style="list-style-type: none"> <li>1-Counseling during home visits on breastfeeding</li> <li>2-Counseling during home visits or community discussions on complementary feeding, including food safety, hygiene and sanitation</li> <li>3-Maternal care and nutrition (for pregnant and lactating women)</li> <li>4-IFA supplementation for 6-36 months and reproductive-age women</li> <li>5-Immunization</li> <li>6-Vitamin A supplementation</li> <li>7-Deworming</li> <li>8-Diarrhea treatment and prevention (ORS)</li> <li>9-SAM treatment</li> <li>10-Malaria treatment and prevention (bed nets)</li> <li>11-Growth monitoring</li> <li>12-Antenatal care</li> <li>13-Supplementary nutrition for mothers and children</li> </ul> |
| 6. How is _____ (service) _____ provided?<br><br><i>[Probe:]</i> <ul style="list-style-type: none"> <li>• Ways (AWW/ANM/ASHA) is involved</li> </ul>                                                                                                                                                                                                                                                                                                                                                                                                                                                                                                                                                                                                                                                                                                                |
| 7. Which of these services require close coordination with (AWW/ANM/ASHA)?                                                                                                                                                                                                                                                                                                                                                                                                                                                                                                                                                                                                                                                                                                                                                                                          |

8. Among these, where do you work well with (AWW/ANM/ASHA)? *[Ask for each other type of FLW.]*

*[Probe:]*

- What makes you say that it is well/good? *(definition of good coordination)*
- Tell me about how you work together, from planning to service delivery.
- What helps you in working together? *(facilitators to coordination)*
- What makes it difficult to work together? *(barriers to coordination)*
- Are there any guidelines on how to coordinate with (AWW/ANM/ASHA)?

9. In which service do you not work closely with (AWW/ANM/ASHA)? *[Ask for each other type of FLW.]*

*[Probe:]*

- What makes you say that it is not closely/poor? *(definition of poor coordination)*
- Could you tell me about what happened in those situations?
- Did you work together for this service before?
- What has makes it difficult to work together? *(barriers, e.g. time, personal issues)*
- Did you try (doing) anything to make the situation better?
- Are there other instances where you faced poor coordination?

#### **D. SPECIFIC MECHANISMS OF CONVERGENCE**

10. *[If home visits for IYCF counseling is not yet identified]* How do you coordinate with (AWW/ANM/ASHA) for IYCF counseling?

*[Probe:]*

- How do you plan together for home visits?
- Anything that helps/makes it difficult to coordinate? *(facilitators and barriers)*
- Any guidelines on how to coordinate for home visits?

11. *[If VHND is not yet identified]* How do you coordinate with (AWW/ANM/ASHA) for VHND?

*[Probe:]*

- How do you plan and conduct VHNDs together?
- Anything that helps/makes it difficult to coordinate? *(facilitators and barriers)*
- Any guidelines on how to coordinate for VHNDs?

12. Tell me about the trainings that you received in the past one year.

*[Probe]*

- What were the topics of the trainings?

*[If not mentioned, probe for:]*

- 1-Breastfeeding counseling
- 2-Counseling or community discussions on complementary feeding, including food safety, hygiene and sanitation
- 3-Maternal care and nutrition (for pregnant and lactating women)
- 4-IFA supplementation for 6-36 months and reproductive-age women
- 5-Immunization
- 6-Vitamin A supplementation
- 7-Deworming
- 8-Diarrhea treatment and prevention (ORS)

9-SAM treatment  
 10-Malaria treatment and prevention  
 11-Growth monitoring

- Duration
- Who provided
- Participants (AWW/ANM/ASHA)

*[If no joint trainings:]*

- Do you think there should be joint trainings?
- What would be helpful in making this possible?

13. How do you participate in sector meetings with (AWW/ANM/ASHA)?

*[Probe:]*

- Last time you attended a sector meeting with (AWW/ANM/ASHA)?
- Topics discussed
- Who provided
- Participants

*[If not attended:]*

- What are the reasons for not attending sector meetings with (AWW/ANM/ASHA)?
- What would be helpful in making this possible?

14. How do you participate in Village Health Sanitation Committee (VHSC) (meetings)?

*[Probe:]*

- Are you a member of VHSC?
- Last time you attended a VHSC meeting?
- Topics discussed
- Participants

*[If not attended:]*

- What are the reasons for not attending VHSC meetings?
- What would be helpful in making this possible?

15. How do you think coordination with (AWW/ANM/ASHA) influences service delivery? *(e.g. more efficient, increase coverage, or no changes)*

16. What are your thoughts about how the overall coordination with (AWW/ANM/ASHA) is working? *(e.g. helpful, not always practical or feasible, time consuming, not needed)*

*[Probe:]*

- Any suggestions on ways to improve the coordination?

#### **E. ROUTINIZATION OF VILLAGE HEALTH AND NUTRITION DAYS (VHNDs)**

17. Tell me how VHNDs started your village.

*[Probe:]*

- When did it start?
- What was implemented before VHND?
- Reason for starting VHND
- Any guidelines for VHND
- Is VHND written anywhere as part of your work responsibility? (*e.g. job description*)

18. Please tell me about how VHNDs are planned and conducted.

[Probe:]

- Who initiates the planning?
- How often does planning take place?
- What types of guidelines/manuals used? [*If available in written form, please ask to show it.*]
- Time usually spent in planning for and conducting VHND? How do you handle it?
- Where are VHNDs held?
- Who usually attends? (*e.g. pregnant, lactating women, children, adolescents, newly married couples*)
- Who else should be there but do not attend? Reasons that they do not attend?
- Any special order/way in how activities are conducted?
- Any rituals established with VHNDs? (*e.g. ceremonies, celebrations, periodic gatherings*)
- Reasons for conducting these rituals?

19. How did you learn about conducting VHNDs?

[Probe:]

- Training/orientation received? (*what was learned*)
- Last time that you received training/orientation?
- Who provided training/orientation?
- Other participants

- What services are usually provided during the VHNDs?

[*If not mentioned, probe for:*]

- 1-Breastfeeding counseling
- 2-Counseling or community discussions on complementary feeding, including food safety, hygiene and sanitation
- 3-Counseling on maternal care and nutrition (for pregnant and lactating women)
- 4-IFA supplementation for 6-36 months and reproductive-age women
- 5-Immunization
- 6-Vitamin A supplementation
- 7-Deworming
- 8-Diarrhea treatment and prevention (ORS)
- 9-SAM referrals
- 10-Malaria treatment and prevention (bed nets)
- 11-Growth monitoring
- 12-Registration of pregnant women
- 13-Antenatal care
- 14-Supplementary nutrition provided for underweight children

[Probe:]

- How often are these services provided during VHNDs? (*frequency of service*)
- How much time is spent on providing these activities during VHNDs? How do you handle it?

20. To what extent is money used to conduct VHNDs?

*[Probe:]*

- Different uses of money in conducting VHNDs? (*e.g. incentives for AWW or ASHA, preparation of complementary food, THR, etc.*)
- Where does the money come from? (*source of money*)
- Is the money usually enough to cover the needs? How do you handle it?
- For how long do you think that these funds will be available?

21. Tell me about the materials or equipment used for VHNDs.

*[Probe:]*

- Types of materials or equipment are required to conduct VHNDs? (*e.g. weighing scales, table, screen, medical supplies, THR, referral slips, IEC materials for counseling, MCPC cards, vaccinations, IFA tablets, deworming tablets, etc.*)
- Where do they come from? (*source of materials and equipment*)
- Are there usually enough? (*e.g. enough IFA tablets for all pregnant women attending VHND*)
- Condition of the materials and equipment? (*e.g. weighing scales calibrated*)
- How often are the materials or equipment available during VHNDs? (*e.g. vaccines, IFA always available*)
- For how long do you think that the materials or equipment will be available?
- Any difficulties in making the materials or equipment available?
- What helps in making the materials or equipment available?

22. How do people recognize VHND or talk about it?

*[Probe:]*

- Any visible logos, images or pictures that are commonly used to represent VHND?
- Any specific names or words for VHNDs? [*especially if VHND called by a different name*] Any words or phrases commonly used during VHNDs?

23. How is the VHND generally supervised?

*[Probe:]*

- Who from ICDS and health/NRHM supervises VHNDs?
- Who visited during the last VHND?
- What is usually done/checked when VHNDs are visited?

24. Tell me about any changes that you made to the VHNDs since it first started.

*[Probe:]*

- Types of changes made for the staff working on VHNDs? (*e.g. VHND task assignment to different staff involved*)
- Types of changes made to the facility, materials or equipment for VHNDs? (*e.g. painting of AWCs, new IEC materials, new equipment, etc.*)
- Any changes made to the types of activities conducted at VHNDs?
- Any changes made to how activities are organized or conducted?
- Reasons for making these changes? [*Probe for each of the changes.*]

*[If no changes made:]*

- What are some changes you would like to make to VHNDs?

- What keeps/stops you from making any changes?

25. In what ways do you think VHND helps or not helps you in delivering the services?

*[Probe:]*

- Ways service delivery improved because of VHND? (*e.g. quality, organization, coverage*)
- Ways service delivery got worse because of VHND?
- What has improved in your work because of VHNDs?
- What has become difficult in your work because of VHND?
- Any quality of service changes?

*[If no changes:]*

- Reasons for no changes?
- What needs to be done to make improvements?

26. How do you think VHND is influencing utilization of services?

*[Probe:]*

- Ways service utilization improved because of VHND? (*e.g. coverage, access, timeliness*)
- What helped to make such improvements?
- Ways service utilization got worse because of VHND?
- What difficulties led to such deterioration?

*[If no changes:]*

- Reasons for no changes?
- What needs to be done to make improvements?

## **F. WORK SUPERVISION**

27. Who is your immediate supervisor?

28. Tell me about the meetings with your supervisor.

*[Probe:]*

- Purpose of the meetings? (*topics covered*)
- In the last 6 months, how many times did your supervisor visit you?
- Purpose of your supervisor's last visit?
- Who else usually comes with your supervisor when he/she comes to visit you?
- When do expect to meet your supervisor again?

## **G. JOB MOTIVATION AND SATISFACTION**

29. What motivates you to work as an (AWW/ANM/ASHA)?

*[Probe for:]*

- Salary or monetary incentives

30. How do you feel about working as an (AWW/ANM/ASHA)?

*[Probe:]*

- What makes you feel this way?

- When do you feel this way? (*e.g. specific situations or events*)

31. To what extent do you receive support from your superiors (*i.e. block-level*)?

*[Probe:]*

- Which of your superiors provide support to you?
- Types of support received
- Other types of services that would help you

*[If no support:]*

- Types of support you would like to receive

32. To what extent do you receive support from the community or other groups?

*[Probe:]*

- Groups that provide support to you (*e.g. NGOs, mothers' groups*)
- Types of support received
- Other types of support that would help you

*[If no support:]*

- Types of support you would like to receive

33. Are there any ways to improve how you do your work?

*[Probe:]*

- Types of changes needed to improve your work
- Have you tried to make those changes?

*[If no to above:]*

- Reasons for not making such changes? What is keeping/stopping you from making such changes?



**DEMOGRAPHIC INFORMATION**

Lastly, I would like to ask you some information about your background.

|                                                                                                                               |                                                                                                                                                                                                                                                                                                                                                                    |
|-------------------------------------------------------------------------------------------------------------------------------|--------------------------------------------------------------------------------------------------------------------------------------------------------------------------------------------------------------------------------------------------------------------------------------------------------------------------------------------------------------------|
| 34. Could you please tell me your age?                                                                                        | About _____ years<br>88. Don't know / Do not want to tell                                                                                                                                                                                                                                                                                                          |
| 35. What is the highest level of schooling you have completed and passed?<br><br>[Count only up to the level <u>passed</u> .] | Did not complete Class 1<br>Class 1<br>Class 2<br>Class 3<br>Class 4<br>Class 5<br>Class 6<br>Class 7<br>Class 8<br>Class 9<br>Class 10<br>Class 11<br>Class 12<br>Graduate and above<br>Other diploma<br>Madrasa (if no formal classes exist)<br>Tutions / teaching at home<br>Other training / courses / camps only<br>No schooling<br>-87 Other (specify) _____ |
| 36. Are you presently engaged in any other work for which you receive compensation?                                           | 1. Yes<br>2. No                                                                                                                                                                                                                                                                                                                                                    |

**Thank you.**
